1           A computational examination of the two-streams  
2 hypothesis: which pathway needs a longer memory?

3

4           Abolfazl Alipour<sup>1,2</sup>, John Beggs<sup>2,3</sup>, Joshua Brown<sup>1,2</sup>, Thomas James<sup>1,2\*</sup>

5           1. Department of Psychological and Brain Sciences, Indiana University, Bloomington, Indiana, USA

6           2. Program in Neuroscience, Indiana University, Bloomington, Indiana, USA

7           3. Department of Physics, Indiana University, Bloomington, Indiana, USA

8

## Abstract

9           The two visual streams hypothesis is a robust framework that has inspired  
10 many studies in the past three decades. One of the well-studied claims of this  
11 hypothesis is the idea that the dorsal visual pathway is involved in visually  
12 guided motor behavior, and it is operating with a short memory. Conversely, this  
13 hypothesis claims that the ventral visual pathway is involved in object  
14 classification, and it works using a long-term memory. In this study, we tested  
15 these claims by training identical recurrent neural networks to either perform  
16 viewpoint-invariant object classification (a task attributed to dorsal stream) or  
17 orientation classification (a task attributed to dorsal stream) and measured how  
18 much they rely on their memory in each task. Using a modified leaky-integrator  
19 echo state recurrent network, we found that object classification requires a longer  
20 memory compared to orientation classification. However, when we used long-  
21 short-term memory (LSTM) networks, we observed that object classification  
22 requires longer memory only in larger datasets. Accordingly, our results suggest  
23 that having a longer memory is advantageous in performing ventral stream's  
24 tasks more than their dorsal counterparts, as was originally suggested by the  
25 two-streams hypothesis.

26

## Keywords

27           Two-streams hypothesis, dorsal and ventral visual pathway, LSTM,  
28 convolution neural network, memory, time scale

## 29 1 Introduction

30 The hypothesis that primate vision might be composed of two distinct visual  
31 systems was first proposed in 1968 (Ettlinger, 1990; Schneider, 1969; Trevarthen,  
32 1968). In its initial form, this hypothesis suggested that a geniculostriate system  
33 is processes object recognition and a tectofugal system processes spatial  
34 information. Subsequently, using evidence from lesion studies, Ungerleider and  
35 Mishkin suggested that the dissociation between the two pathways also exists at  
36 the cortical level where both pathways are fed by axons originating from striate  
37 cortex (Mishkin & Ungerleider, 1982). Eventually, an extended two-streams  
38 hypothesis was proposed in a seminal paper by Goodale and Milner in 1992  
39 (Melvyn A. Goodale & Milner, 1992). According to their two-streams hypothesis,  
40 the ventral visual stream (from occipital to temporal cortex) is heavily involved  
41 in object recognition while the dorsal visual stream (occipital to parietal) is  
42 involved in visually guided motor behaviors.

43 Using clinical and experimental evidence, Goodale and Milner argued for a  
44 double dissociation in the primate visual system and listed a series of major  
45 functional differences between the ventral and dorsal pathways. First, the ventral  
46 stream was more involved in conscious perception while dorsal pathway  
47 performance was unconscious. Secondly, the ventral stream had a slower  
48 processing speed and a longer memory, while the dorsal pathway maintains a  
49 faster processing speed and shorter memory (Milner & Goodale, 2008; Norman,  
50 2002). Accordingly, having these processing features was believed to benefit the  
51 functions of each pathway.

52 Among the neuropsychological studies on the differences between dorsal and  
53 ventral stream, the differences between memory spans in the two pathways is  
54 particularly interesting. On the one hand, patients with damage to their parietal  
55 cortex (dorsal stream) were found to have lost their ability to correctly reach  
56 towards visual targets (optic ataxia) while they could still recognize the identity  
57 of objects due to their intact ventral stream. On the other hand, patient D.F.  
58 who had impaired connectivity between her V1 and inferior temporal cortex was  
59 found to be unable to recognize objects or faces, (visual form agnosia) while she

60 was able to perform reaching movements similar to healthy controls (M. A.  
61 Goodale et al., 1991; Milner et al., 1991).

62 Interestingly, when optic ataxia patients were asked to point to a target  
63 location after a 5-second delay, their performance improved in a paradoxical  
64 manner while in healthy subjects, the same delay deteriorated their performance  
65 (Milner et al., 1999). This suggested that optic ataxia patients are not able to  
66 use their dorsal stream in no-delay trials, but they could retrieve some  
67 information from their intact ventral stream in delayed trials. In contrast, when  
68 patient D.F. was presented with two plaques of different widths, she could not  
69 report the width of plaques using her index finger and her thumb. However, when  
70 asked to reach for a specific plaque, her grip aperture (distance between index  
71 finger and thumb) was like healthy controls and correlated with the width of  
72 each plaque. Intriguingly, this patient was not able to perform this visuomotor  
73 reaching task after a 2-second delay as if she has ‘lost’ the information required  
74 to complete the task (M. A. Goodale et al., 1994). This suggested that after a  
75 delay, stored information in the ventral stream is used for reaching. Further  
76 studies by Hu and Goodale using healthy participants consolidated the idea that  
77 real time visuomotor control uses a short memory size estimation mechanism as  
78 compared to conscious size estimation or motor control after delay which uses  
79 long term memory and conscious task engagement (Hu et al., 1999; Hu &  
80 Goodale, 2000). These observations lend credit to the idea that the dorsal stream  
81 has a shorter memory and it is crucial for visually guided behavior while the  
82 ventral stream has a longer memory and it is crucial for object recognition.

83

84 Accordingly, we sought to test these hypotheses in the current study. Specifically,  
85 we tested if there is a relationship between the tasks ascribed to each of the  
86 pathways and the length of optimal memory for each task. In other words, is  
87 short term memory beneficial for tasks that are attributed to dorsal stream (e.g.,  
88 size or orientation classification) and ventral stream functions such as viewpoint-  
89 invariant object classification need longer memory?

90 To this end, we trained simple convolutional neural networks (CNNs) to either  
91 perform orientation classification or viewpoint-invariant object classification.  
92 Subsequently, we replaced the last layer of the trained CNNs with recurrent

93 networks and trained the new networks to recognize frames of rotating objects  
94 or frames of different objects with the same orientation or width. Our results  
95 suggest that a longer memory benefits viewpoint object classification, while a  
96 shorter memory is helpful for orientation classification tasks.  
97

## 98 2 methods

### 99 2.1 datasets

100 We created 16 synthetic objects and rotated each object around its vertical  
101 axis (yaw) to generate images from different viewpoints of each object.  
102 Subsequently, to create two tasks from the same set of objects, we derived a  
103 dataset for a viewpoint invariant object classification task and a dataset for width  
104 classification of objects.

105 To create the viewpoint invariant object classification dataset, we defined 16  
106 object classes where each class had 22 pictures of the same object rotated along  
107 its vertical (yaw) axis (16.3 degrees increments in each frame). This dataset  
108 contained 352 images in total (16x22).

109 To avoid the huge number of orientation classes that can be created when an  
110 object is rotated along all of its three axes, we decided to create a simplified  
111 orientation classification dataset in which we only changed the width of objects  
112 by moving them along their yaw axis. Accordingly, we defined six classes where  
113 each class contained 16 different objects with the same width. Due to the presence  
114 of different vertical orientations with the same width (e.g., 0 and 180 degrees),  
115 the same width of one object was repeated twice, and this resulted in 32 images  
116 per class and a dataset with 192 images in total (6x32). The width classes were  
117 as following:

118

- 119 • Width class No. 1: All objects with an orientation of 0° and 180°
- 120 • Width class No. 2: All objects with an orientation of 16° and 164°
- 121 • Width class No. 3: All objects with an orientation of 33° and 147°
- 122 • Width class No. 4: All objects with an orientation of 49° and 131°

- 123           • Width class No. 5: All objects with an orientation of  $65^\circ$  and  $115^\circ$   
124           • Width class No. 6: All objects with an orientation of  $82^\circ$  and  $98^\circ$   
125  
126  
127  
128  
129

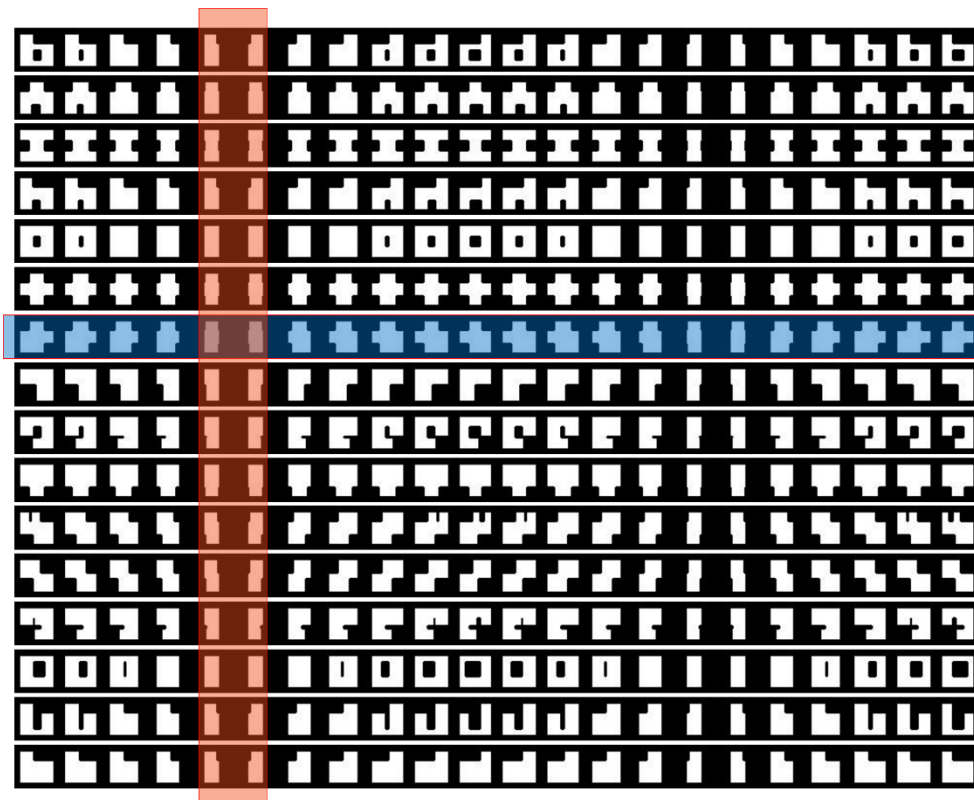

130           Fig. 1. Structure of the synthetic objects' dataset. Each row in this matrix forms  
131 an object class that was used for viewpoint invariant object classification task. The  
132 region indicated by blue is an example of an object class that was split into the  
133 training set (with a probability of 80%) and test set (with a probability of 20%).  
134 Conversely, the orange shaded line indicates images that were put into a width class  
135 (32 images) and further split into a training and test set with 80% and 20%  
136 probability, respectively. Note that only 6 width classes were derived from this  
137 dataset and therefore, some of the columns were not used in width classification task.  
138 See supplementary figure 1 for a detailed illustration of width classes.  
139

140 To see if the results were specific to the synthetic dataset, we repeated our  
141 experiments using the Columbia Object Image Library (COIL-100) dataset (Nene  
142 et al., 1996). This dataset contains images of 100 natural objects, and there are  
143 72 images of the same object from different viewpoints in 5-degree increments in  
144 each object class.

145 In COIL-100 dataset, we derived an orientation classification dataset instead  
146 of width classification dataset to see if our results will generalize to more  
147 naturalistic stimuli. The orientation classification dataset was derived according  
148 to the following procedure: first, 46 objects in the COIL-100 dataset that show  
149 ambiguous orientation as they are rotated (bottles, cans, cups) were removed  
150 and we only used the remaining 54 objects for both of our datasets.

151 For orientation classification, we used four simplified orientation classes as  
152 following:

- 153 • Class 1: All orientations between  $0^\circ \pm 15^\circ$  (5-degree increments) and  
154 their mirror orientations ( $180^\circ \pm 15^\circ$ ) regardless of the object identity.
- 155 • Class 2: All orientations of  $45^\circ \pm 15^\circ$  (5-degree increments) and their  
156 mirror orientations ( $225^\circ \pm 15^\circ$ ) regardless of the object identity.
- 157 • Class 3: All orientations between  $90^\circ \pm 15^\circ$  (5-degree increments) and  
158 their mirror orientations ( $270^\circ \pm 15^\circ$ ) regardless of the object identity.
- 159 • Class 4: All orientations between  $135^\circ \pm 15^\circ$  (5-degree increments) and  
160 their mirror orientations ( $315^\circ \pm 15^\circ$ ) regardless of the object identity.

161

162 This resulted in four classes, each with 756 images (a total of 3,024 images).  
163 which was used for training networks on orientation classification task. Each  
164 image was grayscaled and then downscaled to a 28 by 28 pixels resolution before  
165 being used in training.

166 To make our object classification dataset consistent with the orientation  
167 classification, we only used the 54 object that have been used in our orientation  
168 classification task for object classification as well. In each of the 54 object classes  
169 we had 72 images of the same object from different viewpoints (a total of 3,888  
170 images)

171

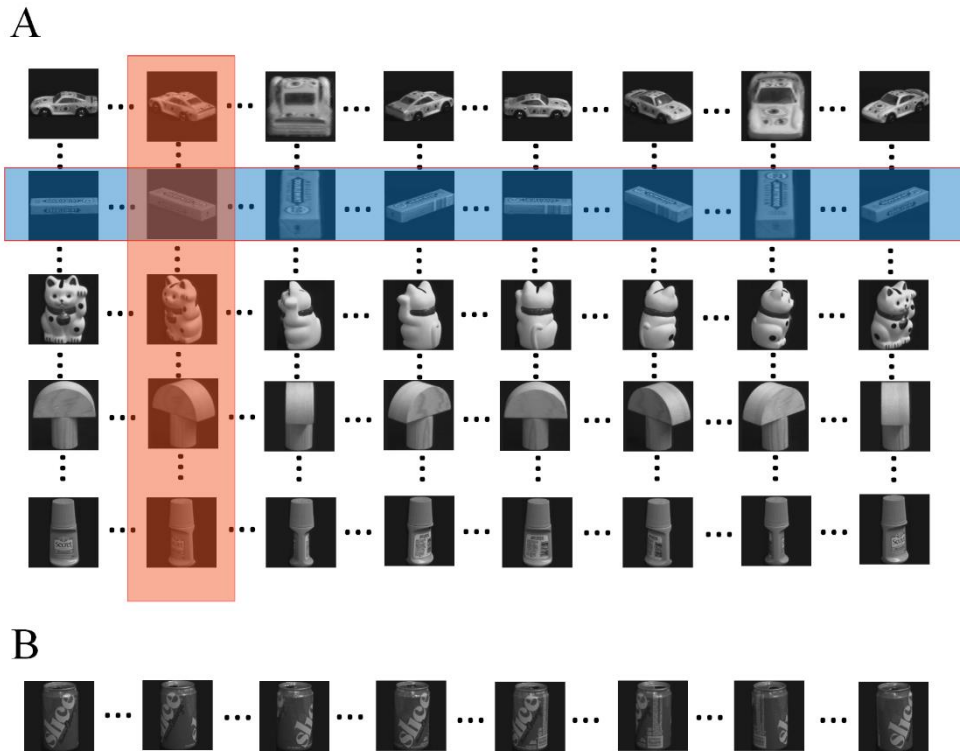

172

173 Fig. 2. Example images from the COIL-100 dataset. COIL-100 contains 100  
174 object classes each with 72 images of the same object from different viewpoints (5-  
175 degree increments). Objects are shown with 45-degree increments and rotating  
176 clockwise. The blue shade covering one row of the image array represents an object  
177 class while the light red shade covering an orientation with multiple objects represent  
178 central elements of an orientation class. An orientation class was defined as all object  
179 images with a central orientation (e.g.  $45^\circ$ ), images with  $\pm 15^\circ$  orientations around  
180 the central orientation plus all of their mirror orientations (e.g.  $225^\circ \pm 15^\circ$ ) B. Some  
181 objects (e.g. the soda can) have an ambiguous orientation as they are moved along  
182 their vertical axis. These objects were excluded from the dataset. The resulting  
183 dataset after removing such objects contained 54 objects in total which was  
184 subsequently used for both tasks.

## 185 2.2 Networks and training procedure

186 Given that the convolutional neural networks (CNNs) show a reasonable  
187 similarity to primate visual system (Cadieu et al., 2014; Schrimpf et al., 2018; D.

188 L. Yamins et al., 2013; D. L. K. Yamins & DiCarlo, 2016) and the fact that both  
189 dorsal and ventral pathways receive information from primary visual areas  
190 (except for some subcortical inputs to the dorsal pathway), we used CNNs as  
191 simple approximations of early visual areas.

192 To this end, we made two architecturally identical convolutional neural  
193 networks (details in figure 1) and trained one of them on the viewpoint invariant  
194 object classification dataset and the other one on the width classification dataset  
195 (orientation classification in COIL-100). The task of the networks at this stage  
196 was to recognize if one image belonged to a specific object class (in case of the  
197 object classifier network) or a width/orientation class (in case of  
198 width/orientation classifier network). At this stage, networks had to classify  
199 individual images.

200

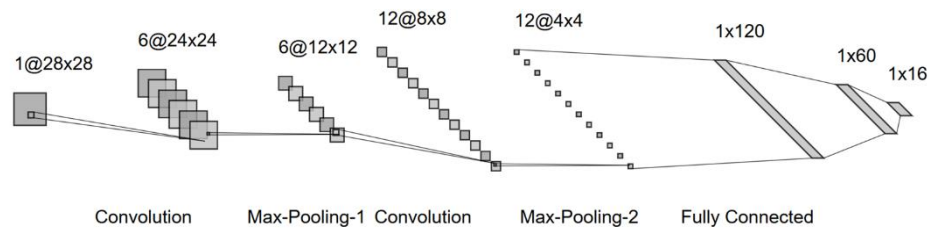

201

202 Fig. 3. Network architecture. Our classifier network comprises 2 convolutional layers  
203 with max-pooling and 3 fully connected layers. Note that here, fully connected layer  
204 is referred to a layer is fully connected to all other nodes in its previous layer and it  
205 does not refer to any recurrence within the layer itself. This network was trained on  
206 either viewpoint invariant object classification (object classifier) or width/  
207 orientation classification. Subsequently, it was modified by adding recurrent layers  
208 to perform sequence learning (see Fig. 4).

209

210

211 Next, to see if temporal information (i.e., memory) in a sequence of images  
212 is important for the performance of the network, we froze the weights in the  
213 feedforward network and replaced the last layer in each of these two networks  
214 with either a leaky-integrator echo state network (LiESN) (experiment 1) or a  
215 long-short term memory (LSTM) network (experiment 2). This was done based



216 on previous studies showing the effectiveness of transfer learning (Tan et al.,  
217 2018). Accordingly, these new networks could learn sequences of stimuli. Hence,  
218 their task was to recognize images in a sequence of frames. For viewpoint  
219 invariant object recognition, the stimulus was a sequence of frames that  
220 contained different viewpoints of the same object. In each training epoch, the  
221 network was fed with this sequence to classify the object identity of the frames  
222 in the sequence. For width/orientation detection, the stimulus was a sequence of  
223 frames that contained different objects with the same width/orientation.  
224 Similarly, in each training epoch, the network was fed with a sequence of frames  
225 to classify the widths/orientations.

226

227

228 In experiment 1.A, we replaced the last layer of classifiers by a leaky-  
229 integrator echo state network and trained them on either viewpoint-invariant  
230 object classification or width/orientation classification. The last layer of the  
231 viewpoint-invariant object classifier was replaced with an LiESN and trained to  
232 recognize images of the same objects from different viewpoints. Similarly, the last  
233 layer of the width/orientation classifier network was replaced with an LiESN,  
234 and the resulting network was trained to recognize the width/orientation in a  
235 series of images containing different objects with similar widths/orientations.

236 In a standard LiESN, the dynamics of the network with  $N_U$  inputs and  $N_R$   
237 reservoir units were governed according to:

238

$$239 \quad X(t) = (1 - a)X(t - 1) + a \tanh(W_{in}u(t) + \theta + Wx(t - 1)) \quad (1)$$

240

241 Where  $X$  is the state of reservoir with  $N_R$  dimensions,  $t$  is the time,  $u$  is the  
242 input signal with  $N_U$  dimensions,  $W_{in}$  is the input weight matrix ( $N_U$  by  $N_R$ )  
243 and  $Wx$  is the reservoir weight matrix ( $N_R$  by  $N_R$ ). The  $\theta$  is the bias term,  
244 and  $a$  is the leaking rate (Gallicchio et al., 2017; Jaeger, n.d.; Schaetti et  
245 al., 2016).

246 As seen in Equation 1, to ensure the stability of the outputs in the standard  
247 LiESN networks, the leaking rate specifies the dependence on past time steps

248 relative to dependence on the current input by the computation in each step. In  
249 other words, when leaking rate goes to zero, the network solely depends on its  
250 past state and ignores the current inputs, and when the leaking rate goes to 1,  
251 the network solely relies on current inputs and ignores the past states.

252 To disentangle the role of past states on task performance from the  
253 importance of current inputs, we disjointed the memory dependence from current  
254 inputs by removing the effect of leaking rate on current inputs:

255

$$256 \quad X(t) = (1 - a)X(t - 1) + \tanh(W_{in}u(t) + \theta + Wx(t - 1)) \quad (2)$$

257

258 As seen in Equation 2, the leaking rate  $a$  does not affect the results of the  
259  $\tanh()$  term of the equation. We will call the  $a$  in this equation the forget  
260 rate from now on. In experiment 1.a, we observed changes in accuracy and  
261 forget rate as we trained the networks to either recognize objects or  
262 widths/orientations. We ran 18 training epochs and measured the test accuracy  
263 and forget rates after each training epoch. This simulation was repeated 30 times,  
264 and the average test accuracies with their corresponding forget rates were  
265 obtained for comparison.

266 In experiment 1.b, we performed a parameter sweep of 50 equally spaced  
267 forget rates between 0 and 1 (0.02 steps) to see which task was harmed by larger  
268 forget rates. To control for the effect of network size on our results, we performed  
269 this parameter sweep on 6 different network sizes ( $n=20,40,80,160,320,640$ ). The  
270 echo state networks were trained for 50 epochs, and their test accuracy was  
271 measured afterward.

272 In experiment 2, we used LSTM networks instead of LiESN networks to see  
273 if our results were independent from the type of recurrent networks used in our  
274 experiments. LSTM network was implemented based on the original LSTM paper  
275 (Hochreiter & Schmidhuber, 1997).

276 To measure how much of the past information (history, memory) is relevant  
277 to the classification performance in an LSTM network, we used the ratio of forget  
278 gate to input gate as an indicator of network reliance on the past information.  
279 Forget gate value in an LSTM network is a number between zero and 1, and it

280 is multiplied by the hidden state value to control the effect of the past  
281 information (hidden states) on the current output of the LSTM network. The  
282 input gate value in an LSTM network is also a number between 0 and 1, and it  
283 is multiplied by the current input of the LSTM network to indicate how much  
284 of the current input should affect the cell state of an LSTM network. Accordingly,  
285 the ratio of forget gate to input gate can show how much a given network is  
286 relying on its memory (hidden states) as compared to its current inputs to  
287 generate an output. The larger this ratio, the more reliance there is on the past  
288 information (memory) in the LSTM network.

289 In experiment 2.a, to obtain these ratios with the synthetic dataset, we  
290 trained our LSTM network on each of the tasks. Subsequently, we fed the test  
291 data to the network and measured the logarithm of the ratio of ‘forget gate values  
292 to input gate values’ in the LSTM network as images were passing through the  
293 network. The average logarithm of (forget gate / input gate) for the entire test  
294 dataset was calculated for both width/orientation classification and object  
295 classification tasks.

296 In experiment 2.b, we trained the LSTM network using the COIL-100 dataset  
297 to see if the small size of the synthetic dataset affected our results. To obtain  
298 these ratios in the COIL-100 dataset, we used the same procedure as experiment  
299 2.a.

300

301 Like LiESN networks, to control for the effect of network size on our results,  
302 we ran all of the experiments on six different network sizes  
303 ( $n=20,40,80,160,320,640$ ). Experiments were performed using PyTorch  
304 (*Automatic Differentiation in PyTorch / OpenReview*, n.d.) running on python  
305 3.6.

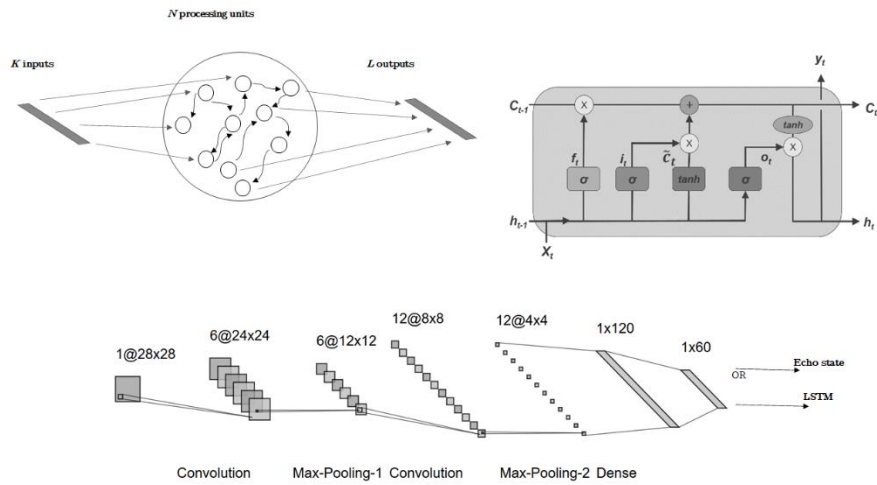

306

307 Fig. 4. The architecture of the recurrent networks used in this study. Top right:  
 308 schematic representation of an LSTM network (from (Zheng et al., 2017), under  
 309 Creative Commons Attribution License). Top left: Schematic representation of an  
 310 echo state network. Bottom: The last layer in the classifier was replaced with either  
 311 an echo state network or an LSTM recurrent network.

312

### 313 3 Results

314

#### 315 3.1 Feedforward convolutional networks (without recurrent 316 networks)

317 We trained the feedforward convolutional network (figure 3.) to either classify  
 318 the object orientation or object identity in both datasets. After 200 epochs of  
 319 training with a learning rate of  $10^{-4}$ , we tested the performance of the feedforward  
 320 networks on the test dataset. Object and width classification accuracy in the  
 321 synthetic dataset were 56% and 75%, respectively. When trained on COIL-100  
 322 dataset, the networks achieved a similar object and orientation classification  
 323 accuracy of 53% and 68%, respectively. See table 1 and figure 5 for graphical  
 324 representation and details of the accuracies in each dataset.

325

326

|          | Synthetic Objects' Dataset |       | COIL-100 Dataset |             |
|----------|----------------------------|-------|------------------|-------------|
|          | Object                     | Width | Object           | Orientation |
| Accuracy | 56%                        | 75%   | 53%              | 68%         |

327

328 Table 1. Numerical values of classification accuracies in feedforward networks  
329 trained on the synthetic objects and the COIL-100 dataset.

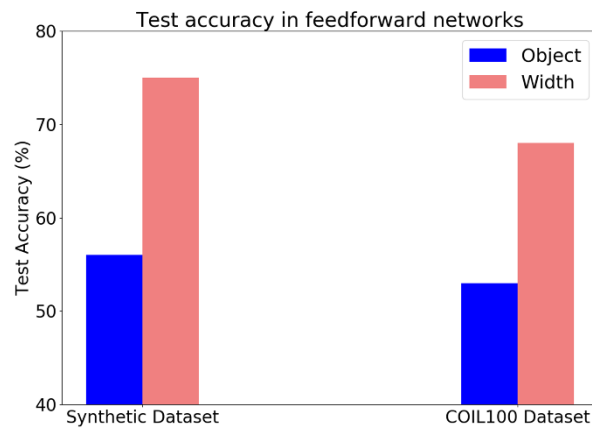

330

331 Figure 5. Classification accuracies of the feedforward networks on the synthetic  
332 dataset and the COIL-100 dataset. The blue bars show object classification  
333 accuracy in the synthetic dataset (left) and the COIL-100 dataset (right). Light  
334 red shows accuracies for width classification in synthetic dataset and orientation  
335 classification in the COIL-100 dataset.

336 3.2 Experiment 1.A: Forget rate learning: which task needs more  
337 memory?

338 To see if adding recurrent networks would help the accuracy of the network  
339 (compared to purely feedforward networks) and to be able to compare the  
340 memory requirements for each task, we replaced the last layer of the feedforward  
341 network with an echo state recurrent network (size=200 neurons). The outputs  
342 of the echo state network were fed to a new linear layer to classify either objects  
343 or orientations (figure 4). Subsequently, we looked at the accuracy and forget  
344 rate of 30 networks with different random initializations as they learned to  
345 classify objects or orientations. We found that as the accuracy of the viewpoint-

346 invariant object classification network increased, the forget rate dropped to lower  
347 values compared to the width classification network. These results were  
348 consistent regardless of the initial choice of forget rate value (figure 6). Moreover,  
349 object classification task required smaller forget rates (longer memory) regardless  
350 of the dataset type by showing the same trend in both synthetic objects and  
351 COIL-100 dataset. Adding recurrence to the classifiers benefited object  
352 classification more than orientation classification in the synthetic dataset but not  
353 COIL-100 dataset. Notably, when we looked at the networks initialized by a  
354 forget rate of 0.25, we observed that in the synthetic objects' dataset, object  
355 classification accuracy increased from 56% to 92 (36% improvement) while the  
356 width classification increased from 75% to 94% (only improved by 19%). In the  
357 COIL-100 dataset, however, the object classification increased from 53% to 85%  
358 (32% improvement), and width classification also increased from 68% to 99%  
359 (31% improvement).

360 Overall, results using this modification suggested that object classification needed  
361 smaller forget rate values and hence, a longer memory (figure 6).

362

363

364

365

366

367

368

369

370

371

372

373

374

375

376

377

378

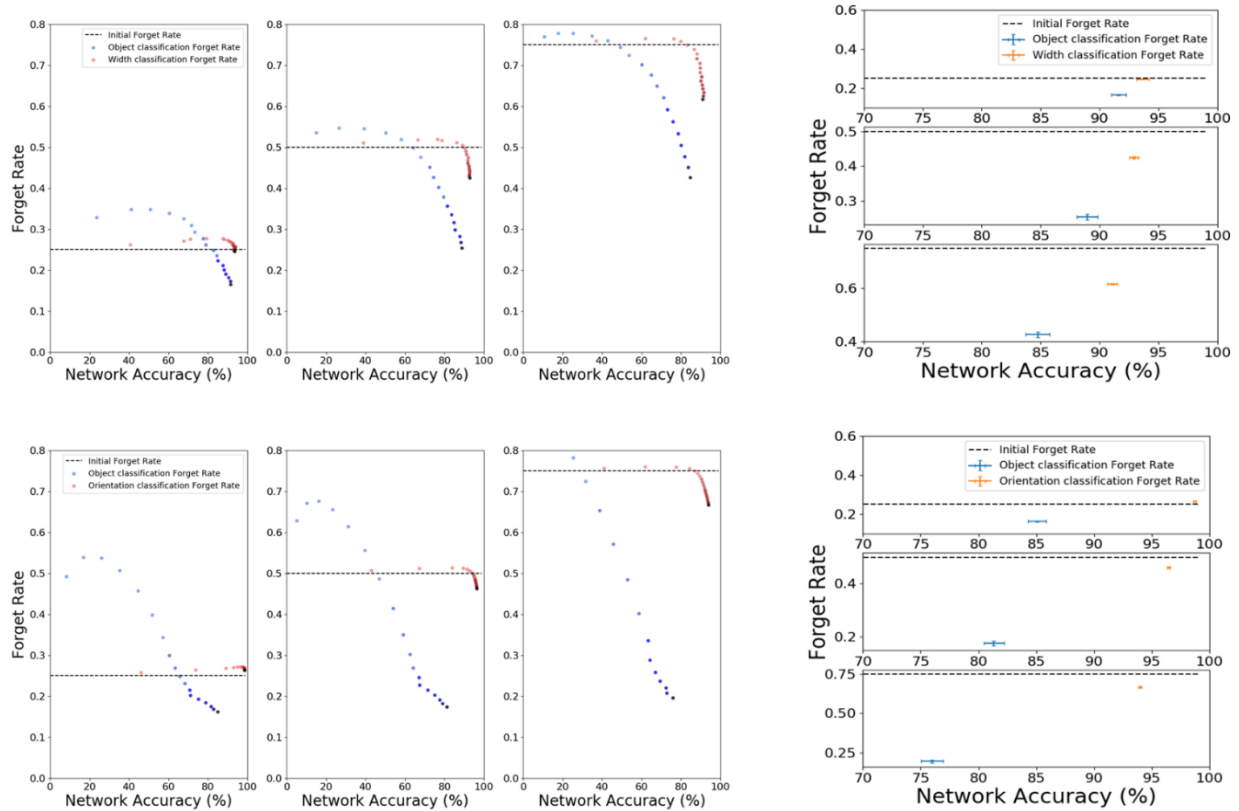

398 Fig. 6. Simultaneous changes of forget rate and accuracy in two networks as one  
 399 learns to classify objects and the other learns to classify widths/orientations. Top  
 400 left: object classification results are shown in blue, and width classification results  
 401 are shown in red. Darker shades indicate the progression in the learning epochs (from  
 402 epoch 1 to 18). Dashed lines show initial forget rates. Subpanel on the left: changes  
 403 in leaky rate and accuracy in a network with initial leaky rate of 0.25. As the network  
 404 learns the sequence, the accuracy of the network increases in both tasks and the  
 405 forget rate goes down (longer memory) in both networks. However, the forget rate  
 406 goes to smaller values (longer memory) in object classification networks. Middle and  
 407 right subpanels showing the same with different initial values for the forget rate (0.5  
 408 and 0.75). Each dot represents the mean forget rate and accuracy value of 30 network  
 409 realizations. The top plots belong to values obtained from the synthetic dataset. Top  
 410 right: final forget rate values, the error bars in here, and other figures in this paper  
 411 are SEMs. The bottom plots show the same results obtained from the COIL100  
 412 dataset.

413 3.3 Experiment 1.B: Parameter sweep in ESNs: which task needs  
414 more memory?

415

416 Building on the results of experiment 1.A, we sought to test if our results  
417 (longer memory in object classification) depend on the network size.  
418 Additionally, we aimed to perform a parameter sweep for forget rates to see how  
419 network accuracies change if we fix the forget rates and only allow output weights  
420 change (weights from echo state network to linear classifying layer). To this end,  
421 we kept the forget rate constant and let the network train until it reaches a  
422 performance plateau after 50 training epochs for each of the 50 different forget  
423 rates between 0 and 1 with 0.02 intervals. This simulation repeated 30 times  
424 using 30 network realizations. Subsequently, average accuracies of these networks  
425 were taken for comparison. The results suggested that overall, parameter sweep  
426 does not effectively separate the forget rate requirements in object classification  
427 from the forget rate requirements in width classification. Specifically, we observed  
428 that in networks trained on the synthetic objects' dataset, both tasks show  
429 similar changes in the accuracy as the forget rate changes (figure 7). The results  
430 obtained from the COIL-100 dataset were similar and did not show apparent  
431 dissociation between the two tasks (supplementary figure 2).

432



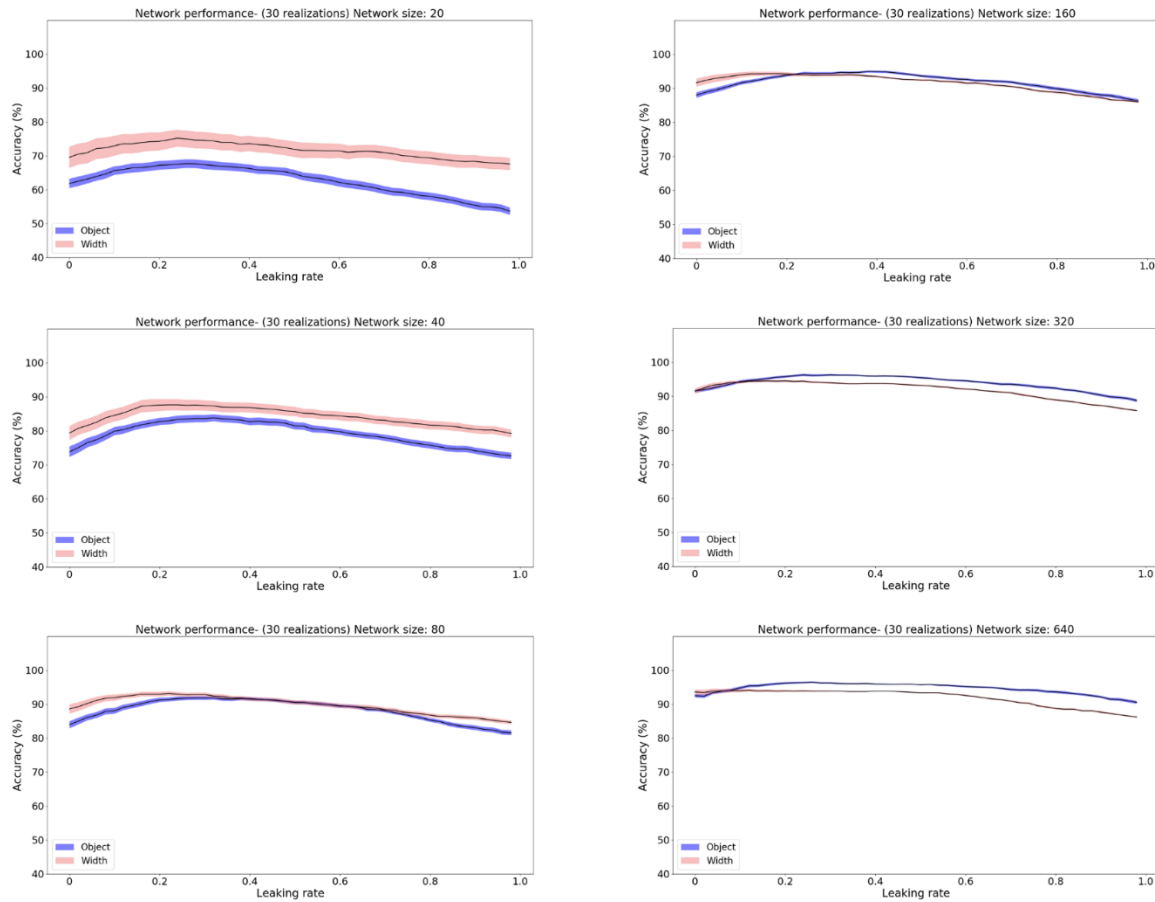

433 Figure 7. Performance of echo state networks in viewpoint-invariant object  
434 classification and width classification tasks with different forget rates. Each subpanel  
435 indicates the accuracy of both object classification (blue) and width classification  
436 networks (red) with different forget rates (0 to 1, 0.02 intervals) in each network size  
437 (20 to 640 neurons). The accuracy of the networks was measured after 50 training  
438 epochs so that networks reach a relative performance plateau. Results are the mean  
439 accuracy of 30 different network realizations, and shaded areas are standard error of  
440 the mean (SEM).

### 441 3.4 Experiment 2.A: Which task requires more memory? LSTM 442 networks trained on synthetic objects' dataset

443 In experiment 2.A, we used LSTM networks instead of echo state networks  
444 to measure memory dependence of each task in a different type of recurrent  
445 network. Similar to our echo state network experiments, when feedforward

446 networks were trained on each task, their weights were frozen, and their last  
447 layer was replaced by an LSTM network and a linear classifier. After training,  
448 we fed the network with sequences of test images again and extracted the  
449 logarithm of forget gate to input gate ratio as each single test image was passed  
450 through the network. We found that the average logarithm of forget to input  
451 gate ratio is higher in *width* classification compared to viewpoint invariant object  
452 classification. To investigate this effect more, we changed the learning rate from  
453 the initial value ( $10^{-3}$ ) to  $10^{-4}$  to see if the accuracy and logarithm of ratios are  
454 sensitive to the learning rate. We observed that even though the logarithm of  
455 ratios changes, the overall trend stays the same, and *width* classification has  
456 higher input to forget rate ratio (longer memory) compared to object  
457 classification. An interesting trend was the reduction of the logarithm of forget  
458 to input gate ratio as network size increased which may point to an inverse  
459 relationship between network size and memory dependence. See figure 8 for more  
460 detail.

461

462

463

464

Accuracy and memory dependence of LSTM networks (learning rate=  $10^{-3}$ )

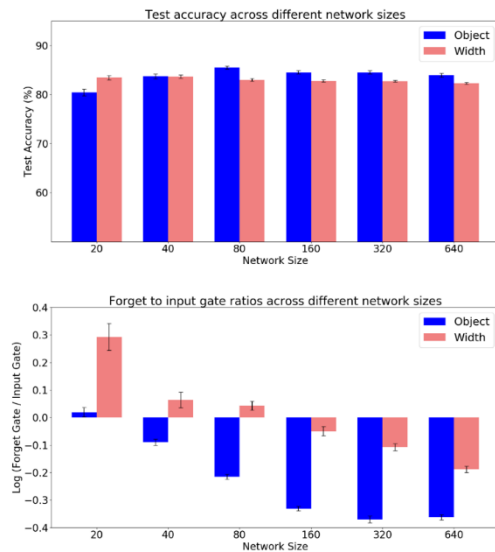

Accuracy and memory dependence of LSTM networks (learning rate=  $10^{-4}$ )

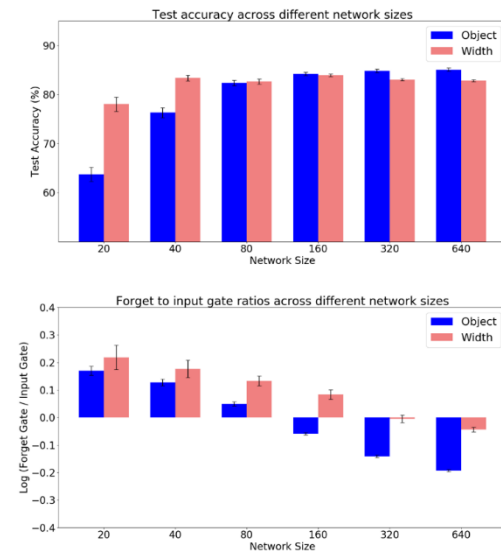

465

466 Fig. 8. Difference between the forget to input gate ratios (as measures of memory)  
 467 in width and object classification tasks obtained from networks with different sizes  
 468 trained on synthetic objects' dataset. Top left: mean accuracy of networks in each  
 469 task as the network size changes (20 to 640 neurons). Blue bars are accuracies in  
 470 object classification tasks, and light red bars are accuracies in width classification  
 471 tasks (learning speed= $10^{-3}$ ), values are averaged across 30 network realizations.  
 472 Bottom left: Bars show the average  $\log\left(\frac{\text{forget gate}}{\text{input gate}}\right)$  for 30 networks trained on either  
 473 object classification (blue) or width classification (light red). Error bars show the  
 474 standard error of the mean (SEM). Top right and bottom right show the same values  
 475 for networks trained with a learning rate of  $10^{-4}$ .

476

### 477 3.5 Experiments 2.B: Which task requires more memory? LSTM 478 networks trained on COIL-100 dataset.

479 All parameters in experiment 2.B were the same as experiment 2.A, but we  
 480 used the COIL-100 dataset instead of our synthetic dataset to train the network.  
 481 In contrast to the results we obtained from the synthetic dataset, the average  
 482 logarithm of forget to input gate ratio is higher when the network is performing  
 483 viewpoint invariant object classification compared to orientation classification.

484 Additionally, the object classification networks kept a higher forget to input gate  
 485 ratio in all sizes. This trend remained the same regardless of the learning rate.  
 486 See figure 9 for details. Interestingly, the overall forget to input gate ratios  
 487 showed a decreasing trend as we increased the network size in here as well. See  
 488 the discussion section for a possible explanation for this observation.  
 489  
 490  
 491  
 492  
 493  
 494

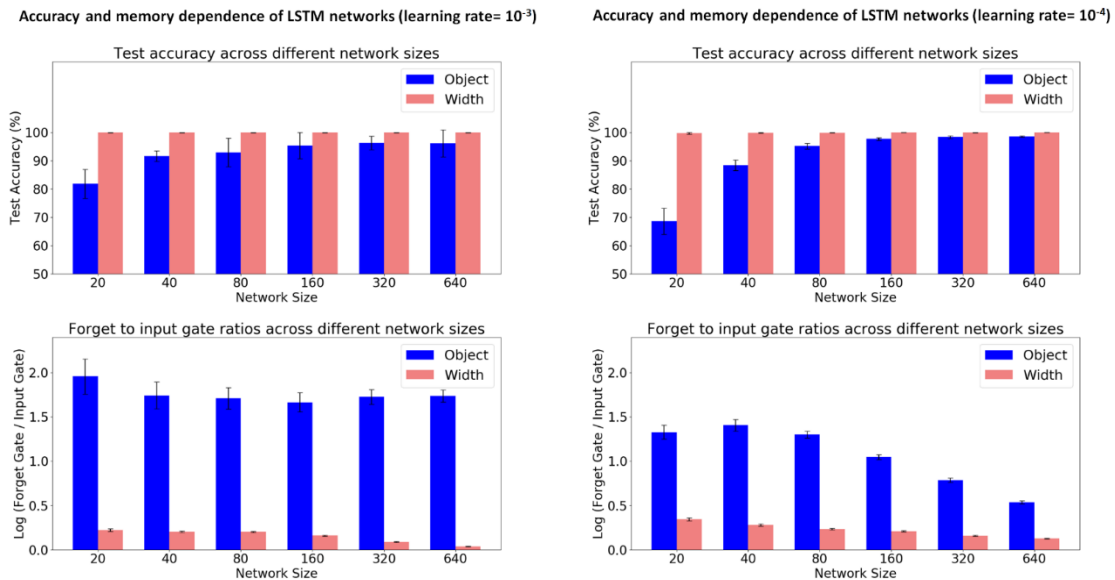

495 Fig. 9. Difference between the forget to input gate ratios (as measures of memory)  
 496 in orientation and object classification tasks in networks with different sizes trained  
 497 on COIL-100 dataset. Top left: mean accuracy of networks in each task as the  
 498 network size changes (20 to 640 neurons). Blue bars are accuracies in object  
 499 classification tasks, and light red bars are accuracies in orientation classification tasks  
 500 (learning speed= $10^{-3}$ ); values are averaged across 30 network realizations. Bottom  
 501 left: Bars show the average  $\log\left(\frac{\text{forget gate}}{\text{input gate}}\right)$  for 30 networks of the same size trained  
 502 on either object classification (blue) or orientation classification (light red). Error  
 503 bars show the standard error of the mean (SEM). Top right and bottom right show  
 504 the same values for networks trained with a learning rate of  $10^{-4}$ .

## 505 4 Discussion

506 In this study, we have shown that in echo state networks, learning to classify  
507 objects requires a longer memory compared to width/orientation classification.  
508 Additionally, our results indicated that in LSTM networks, object classification  
509 requires a longer memory only when the network is trained on larger datasets (3-  
510 4 thousand images) and not in small datasets (200-400 images).

511

512 One natural first response to these results would be to think that differences  
513 in memory lengths in these tasks are probably caused by the length of image  
514 sequences in each class of the dataset, i.e., object classification networks might  
515 have longer memory simply because they have been learning longer sequences of  
516 images. However, we deliberately used longer sequences in width/orientation  
517 classes of both datasets. Notably, there were 32 images in each width class of the  
518 synthetic objects' dataset (compared to 22 in the object classes). In the COIL-  
519 100 dataset, there were 756 images in each orientation class compared to 72 in  
520 each object class.

521 The second concern with the results is the fact that the total number of  
522 images in each task is different. Therefore, the reliance on memory reflects the  
523 amount of information that has to be learned in each task. Specifically, in the  
524 synthetic objects' dataset, there were 192 images in the orientation classification  
525 task, while there were 352 images in the viewpoint invariant object classification  
526 task. Similarly, in COIL-100 dataset, there were 3,888 images in the object  
527 classification task, while there were only 3,024 images in the orientation  
528 classification task. However, if this were the case, we would not see the width  
529 classification networks trained on synthetic objects' dataset to have higher  
530 memory reliance compared to object classification networks (192 images  
531 compared to 352 images, see figure 7 for LSTM results). Moreover, if the number  
532 of images in each task was a primary factor in determining accuracy, orientation  
533 classification in networks trained on the synthetic objects' dataset would become  
534 significantly better than the orientation classification of networks trained on the  
535 COIL-100 dataset (3,024 compared to 194 images). However, the orientation  
536 classification accuracies in both echo state networks and LSTMs trained on either

537 of the datasets are similar (figure 6 showing echo state networks, and figure 8  
538 and 9 showing LSTMs).

539 One interesting effect that we observed in this study was the relationship  
540 between memory and size of the network. Both echo state networks and LSTMs  
541 indicated an inverse relationship between network size and their need for larger  
542 memory spans (figure 7, 8, and 9). While the relationship between network  
543 architecture and memory capacity in echo state networks has been explored  
544 elsewhere (Gallicchio et al., 2018), the exact relationship between network size  
545 and memory capacity deserves further investigation.

546

547 From a broader perspective, our results were in line with clinical findings in  
548 patients and the two-streams hypothesis for primate vision. Meanwhile, It is  
549 noteworthy to mention that some studies called initial assumptions of the two-  
550 streams hypothesis into question (Hesse & Schenk, 2014; Konen & Kastner, 2008;  
551 Rogers et al., 2009), (see (Schenk & Hesse, 2018) for a critical review). Thus, our  
552 results cannot generalize to the entire dorsal pathway. In particular, it is essential  
553 to note that according to Kravitz et al., the dorsal stream itself is composed of  
554 three different sub-pathways: the parieto-prefrontal, the parieto-medial temporal,  
555 and the parieto-premotor paths (Kravitz et al., 2011). Specifically, the parieto-  
556 prefrontal path is involved in spatial working memory and eye movement control,  
557 the parieto-medial temporal pathway is critical for spatial navigation and spatial  
558 long term memory, and the parieto-premotor pathway is heavily involved in  
559 visually controlled movements such as reaching and grasping (Kravitz et al.,  
560 2011). Due to the nature of the tasks we used here, our results are most relevant  
561 to the parieto-premotor pathway.

562 The short-term nature of memory in the dorsal pathway has been extensively  
563 studied using both psychophysical and imaging studies and generated mixed  
564 results. For example, Cant et al. showed that while naming of objects can be  
565 primed, a grasping movement cannot be primed by previous grasping movements  
566 (Cant et al., 2005), supporting the short-term nature of the visuomotor control  
567 representations. Similarly, Jax and Rosenbaum reported that while priming in a  
568 visually guided obstacle avoidance task with short delays between the priming  
569 stimulus and actual task was possible, this effect went away with delays that

570 were longer than a second (Jax & Rosenbaum, 2007). Meanwhile, the idea that  
571 in delayed motor-controlled tasks, the source of information switches from dorsal  
572 to ventral pathway was challenged by some studies (Schenk & Hesse, 2018). For  
573 example in a study by Himmelbach et al., a bilateral optic ataxia patient (IG)  
574 showed strong activity in regions around his lesion in the dorsal pathway in both  
575 immediate and delayed reaching tasks (Himmelbach et al., 2009). Moreover, the  
576 famous patient D.F. showed that she could perform delayed visually guided  
577 movement as good as controls when the environmental cues (allocentric  
578 information) were *not* available (Hesse & Schenk, 2014). This study lent credit  
579 to the idea that the dorsal pathway can still keep information related to visually  
580 guided behavior for long delays (>2seconds), and it is the contextual information  
581 that becomes available after a delay.

582 The short memory span of the dorsal stream could be understood from the  
583 perspective of its inputs as well. Magnocellular inputs mostly innervate the dorsal  
584 pathway whereas the ventral pathway is more innervated by parvocellular inputs  
585 (Merigan & Maunsell, 1993). The main difference between these two types of  
586 inputs is that the magnocellular cells are better at the classification of higher  
587 temporal frequencies, whereas parvocellular cells are more suitable for higher  
588 spatial frequencies. Additionally, magnocellular cells are 20 milliseconds faster in  
589 terms of their response latency to stimuli (Bullier & Nowak, 1995). The faster  
590 dynamics of the dorsal pathway is in line with what we found in our study.

591 Since similar two-stream dissociation is suggested in other sensory modalities  
592 such as somatosensation (Dijkerman & de Haan, 2007; James & Kim, 2010) or  
593 audition (Hickok & Poeppel, 2007; Rauschecker, 2018), the relationship between  
594 short term memory and motor control tasks might even go beyond vision.  
595 However, our current datasets and tasks are limited to vision, and specific tasks  
596 for each modality would be required to find out if such a relationship holds for  
597 other sensory modalities as well.

598 Another issue is the fact that the majority of the computational models of  
599 the visual cortex are based on the ventral stream (e.g., (Lotter et al., 2016,  
600 2020)), while models incorporating both ventral and dorsal pathways are less  
601 common (but see (O'Reilly et al., 2017, 2020) as an example incorporating both  
602 streams). We believe that newer models of the visual cortex should incorporate

603 the tasks relevant to both streams. This will demonstrate if different tasks (e.g.  
604 object recognition vs. motor control) require incompatible computational  
605 paradigms that need different circuitries.

## 606 5 Limitations

607 Our current study comes with several shortcomings. First, we could have  
608 added a motor control task to our width classification task to be able to make a  
609 direct comparison between our model and parietal-premotor pathway.

610 Second, since the dorsal pathway receives information from subcortical  
611 sources such as superior colliculus and these sources are mostly innervated by  
612 magnocellular cells with higher sensitivity to lower spatial frequencies, we could  
613 have used larger sized kernels for convolutional layers that we used to  
614 approximate dorsal pathway. However, doing so would render comparison of  
615 recurrent networks a bit less straight forward.

## 616 6 Conclusions

617 In the present study, we have shown that there is a close relationship between  
618 length of memory in recurrent networks and how they perform in object  
619 classification or width/orientation classification tasks. While having a longer  
620 memory span benefits object classification performance (as a ventral stream task)  
621 in echo state networks, in LSTM networks, such effect is present only when the  
622 network is trained on larger dataset.

623

## 624 7 Acknowledgment

625 This research was supported in part by Lilly Endowment, Inc., through its  
626 support for the Indiana University Pervasive Technology Institute and in part  
627 by the Indiana METACyt Initiative. The Indiana METACyt Initiative at IU was  
628 also supported in part by Lilly Endowment, Inc. The authors acknowledge the  
629 Indiana University Pervasive Technology Institute for providing Carbonate HPC



630 resources that have contributed to the research results reported within this paper  
631 (Stewart et al., 2017).

## 632 8 Supplementary Material

### 633 8.1 Code

634

635 The code used in this study is available at (<https://github.com/Abolfazl->  
636 Alipour).

637

638

639 8.2 Supplementary figures

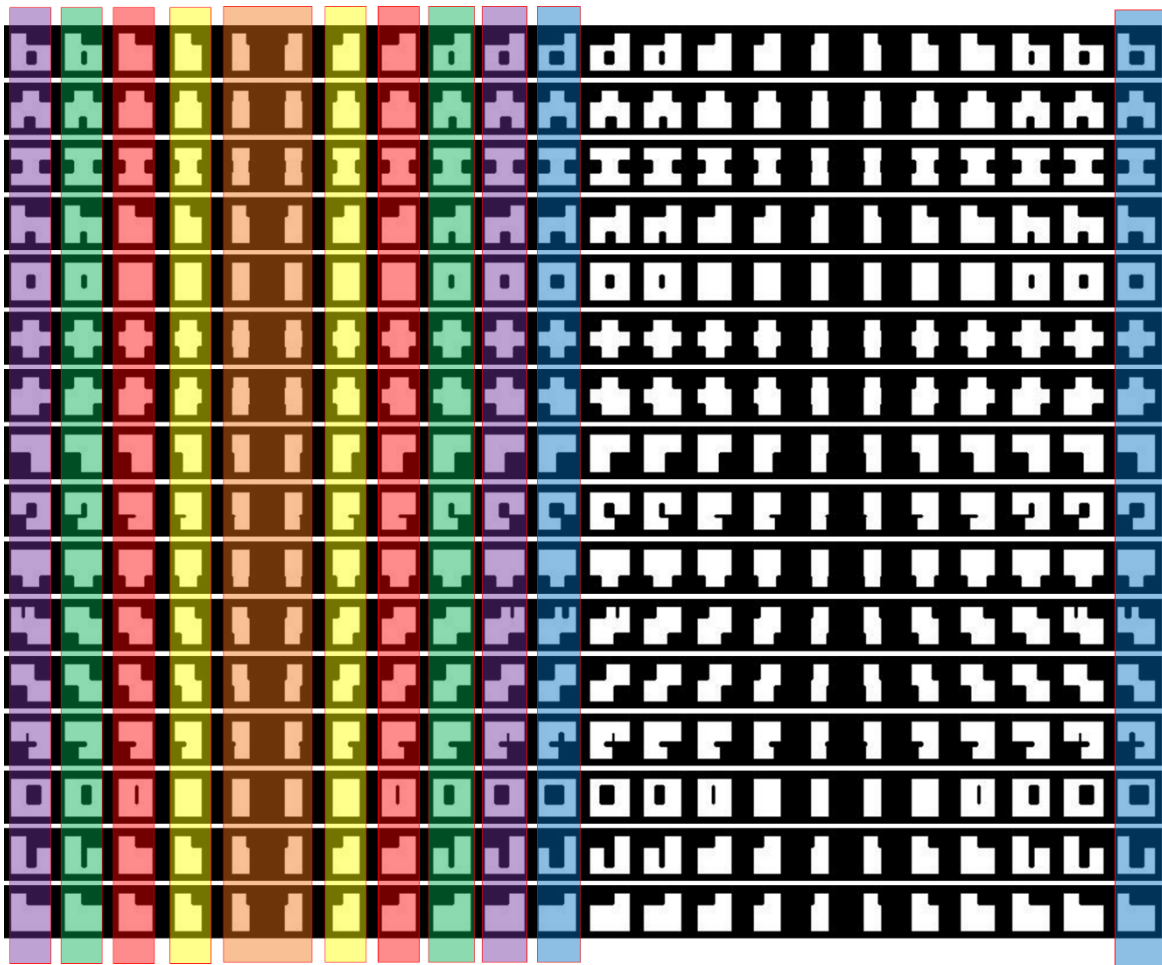

-  Width class No. 1: All objects with an orientation of  $0^\circ$  and  $180^\circ$
-  Width class No. 2: All objects with an orientation of  $16^\circ$  and  $164^\circ$
-  Width class No. 3: All objects with an orientation of  $33^\circ$  and  $147^\circ$
-  Width class No. 4: All objects with an orientation of  $49^\circ$  and  $131^\circ$
-  Width class No. 5: All objects with an orientation of  $65^\circ$  and  $115^\circ$
-  Width class No. 6: All objects with an orientation of  $82^\circ$  and  $98^\circ$

640 Supplementary Fig. 1. Width classes derived from the synthetic dataset.

641 Each with class is shown by a different color.

642

643

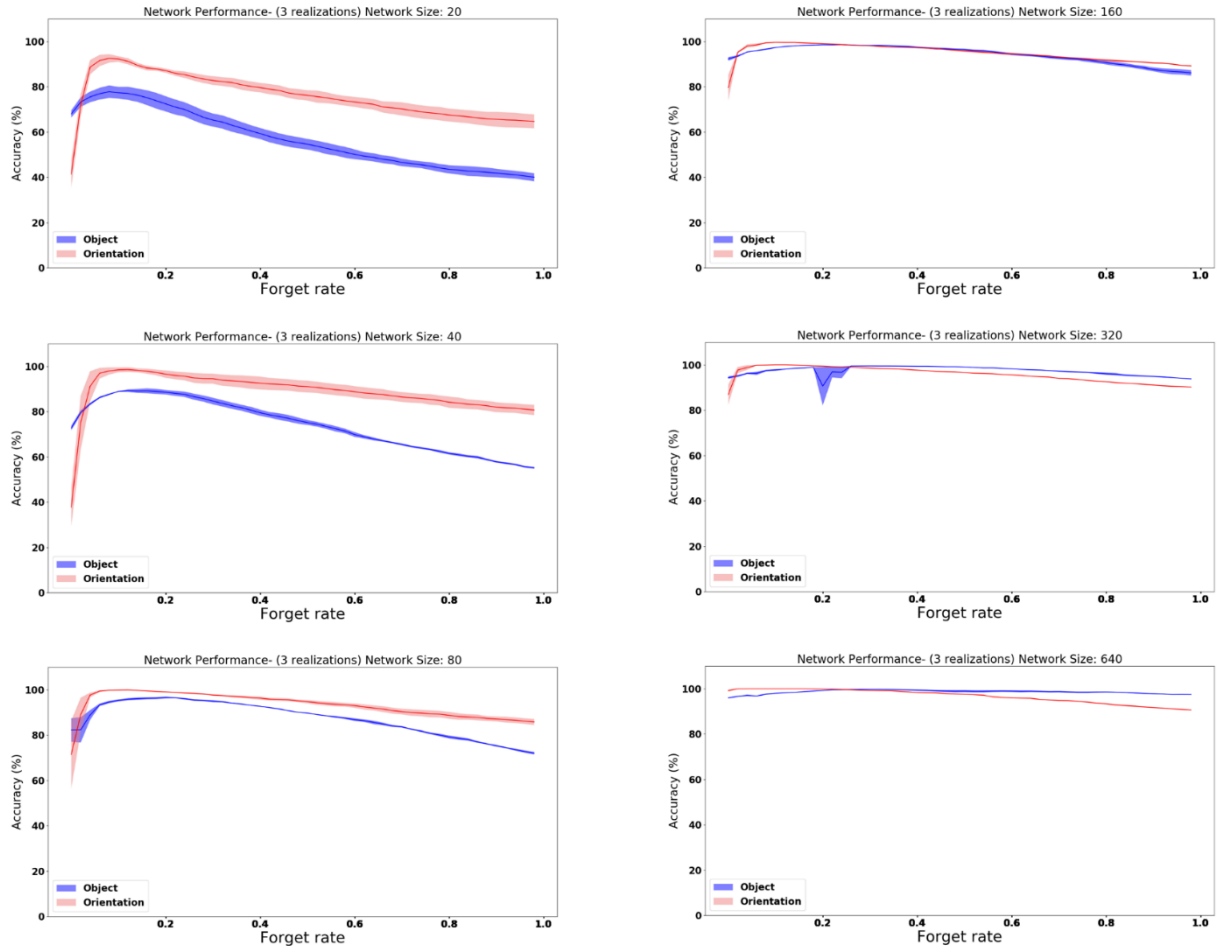

644            Supplementary Fig. 2. Performance of echo state networks in viewpoint-invariant  
645            object classification and width classification tasks trained on COIL-100 dataset. Each  
646            subpanel indicates the accuracy of both object classification (blue), and orientation  
647            classification networks (red) with different forget rates (0 to 1, 0.02 intervals) in each  
648            network size (20 to 640 neurons). The accuracy of the networks was measured after  
649            50 training epochs so that networks reach a relative performance plateau. Results  
650            are the mean accuracy of 3 different network realizations, and shaded areas are  
651            standard error of the mean (SEM).

652

653

654 9 References

- 655 *Automatic differentiation in PyTorch* | *OpenReview*. (n.d.). Retrieved  
656 December 14, 2019, from  
657 <https://openreview.net/forum?id=BJJsrmfCZ>
- 658 Bullier, J., & Nowak, L. G. (1995). Parallel versus serial processing: New  
659 vistas on the distributed organization of the visual system. *Current*  
660 *Opinion in Neurobiology*, 5(4), 497–503.  
661 [https://doi.org/10.1016/0959-4388\(95\)80011-5](https://doi.org/10.1016/0959-4388(95)80011-5)
- 662 Cadieu, C. F., Hong, H., Yamins, D. L. K., Pinto, N., Ardila, D., Solomon, E.  
663 A., Majaj, N. J., & DiCarlo, J. J. (2014). Deep Neural Networks Rival  
664 the Representation of Primate IT Cortex for Core Visual Object  
665 Recognition. *PLOS Computational Biology*, 10(12), e1003963.  
666 <https://doi.org/10.1371/journal.pcbi.1003963>
- 667 Cant, J. S., Westwood, D. A., Valyear, K. F., & Goodale, M. A. (2005). No  
668 evidence for visuomotor priming in a visually guided action task.  
669 *Neuropsychologia*, 43(2), 216–226.  
670 <https://doi.org/10.1016/j.neuropsychologia.2004.11.008>
- 671 Dijkerman, H. C., & de Haan, E. H. F. (2007). Somatosensory processes  
672 subserving perception and action. *Behavioral and Brain Sciences*,  
673 30(2), 189–201. <https://doi.org/10.1017/S0140525X07001392>

- 674 Ettliger, G. (1990). “Object Vision” and “Spatial Vision”: The  
675 Neuropsychological Evidence for the Distinction. *Cortex*, 26(3), 319–  
676 341. [https://doi.org/10.1016/S0010-9452\(13\)80084-6](https://doi.org/10.1016/S0010-9452(13)80084-6)
- 677 Gallicchio, C., Micheli, A., & Pedrelli, L. (2017). Deep reservoir computing:  
678 A critical experimental analysis. *Neurocomputing*, 268, 87–99.  
679 <https://doi.org/10.1016/j.neucom.2016.12.089>
- 680 Gallicchio, C., Micheli, A., & Silvestri, L. (2018). Local Lyapunov exponents  
681 of deep echo state networks. *Neurocomputing*, 298, 34–45.  
682 <https://doi.org/10.1016/j.neucom.2017.11.073>
- 683 Goodale, M. A., Jakobson, L. S., & Keillor, J. M. (1994). Differences in the  
684 visual control of pantomimed and natural grasping movements.  
685 *Neuropsychologia*, 32(10), 1159–1178. [https://doi.org/10.1016/0028-](https://doi.org/10.1016/0028-3932(94)90100-7)  
686 [3932\(94\)90100-7](https://doi.org/10.1016/0028-3932(94)90100-7)
- 687 Goodale, M. A., Milner, A. D., Jakobson, L. S., & Carey, D. P. (1991). A  
688 neurological dissociation between perceiving objects and grasping  
689 them. *Nature*, 349(6305), 154–156. <https://doi.org/10.1038/349154a0>
- 690 Goodale, Melvyn A., & Milner, A. D. (1992). Separate visual pathways for  
691 perception and action. *Trends in Neurosciences*, 15(1), 20–25.  
692 [https://doi.org/10.1016/0166-2236\(92\)90344-8](https://doi.org/10.1016/0166-2236(92)90344-8)
- 693 Hesse, C., & Schenk, T. (2014). Delayed action does not always require the  
694 ventral stream: A study on a patient with visual form agnosia. *Cortex*,  
695 54, 77–91. <https://doi.org/10.1016/j.cortex.2014.02.011>

- 696 Hickok, G., & Poeppel, D. (2007). The cortical organization of speech  
697 processing. *Nature Reviews Neuroscience*, 8(5), 393–402.  
698 <https://doi.org/10.1038/nrn2113>
- 699 Himmelbach, M., Nau, M., Zündorf, I., Erb, M., Perenin, M.-T., & Karnath,  
700 H.-O. (2009). Brain activation during immediate and delayed reaching  
701 in optic ataxia. *Neuropsychologia*, 47(6), 1508–1517.  
702 <https://doi.org/10.1016/j.neuropsychologia.2009.01.033>
- 703 Hochreiter, S., & Schmidhuber, J. (1997). Long Short-Term Memory. *Neural*  
704 *Computation*, 9(8), 1735–1780.  
705 <https://doi.org/10.1162/neco.1997.9.8.1735>
- 706 Hu, Y., Eagleson, R., & Goodale, M. A. (1999). The effects of delay on the  
707 kinematics of grasping. *Experimental Brain Research*, 126(1), 109–  
708 116. <https://doi.org/10.1007/s002210050720>
- 709 Hu, Y., & Goodale, M. A. (2000). Grasping after a Delay Shifts Size-Scaling  
710 from Absolute to Relative Metrics. *Journal of Cognitive*  
711 *Neuroscience*, 12(5), 856–868.  
712 <https://doi.org/10.1162/089892900562462>
- 713 Jaeger, H. (n.d.). *The “echo state” approach to analysing and training*  
714 *recurrent neural networks – with an Erratum note*. 48.
- 715 James, T. W., & Kim, S. (2010). Dorsal and Ventral Cortical Pathways for  
716 Visuo-haptic Shape Integration Revealed Using fMRI. In J. Kaiser &  
717 M. J. Naumer (Eds.), *Multisensory Object Perception in the Primate*

- 718            *Brain* (pp. 231–250). Springer. <https://doi.org/10.1007/978-1-4419->  
719            5615-6\_13
- 720    Jax, S. A., & Rosenbaum, D. A. (2007). Hand path priming in manual  
721            obstacle avoidance: Evidence that the dorsal stream does not only  
722            control visually guided actions in real time. *Journal of Experimental*  
723            *Psychology: Human Perception and Performance*, 33(2), 425–441.  
724            <https://doi.org/10.1037/0096-1523.33.2.425>
- 725    Konen, C. S., & Kastner, S. (2008). Two hierarchically organized neural  
726            systems for object information in human visual cortex. *Nature*  
727            *Neuroscience*, 11(2), 224–231. <https://doi.org/10.1038/nn2036>
- 728    Kravitz, D. J., Saleem, K. S., Baker, C. I., & Mishkin, M. (2011). A new  
729            neural framework for visuospatial processing. *Nature Reviews*  
730            *Neuroscience*, 12(4), 217–230. <https://doi.org/10.1038/nrn3008>
- 731    Lotter, W., Kreiman, G., & Cox, D. (2016). *Deep Predictive Coding Networks*  
732            *for Video Prediction and Unsupervised Learning*.  
733            <https://arxiv.org/abs/1605.08104v5>
- 734    Lotter, W., Kreiman, G., & Cox, D. (2020). A neural network trained for  
735            prediction mimics diverse features of biological neurons and  
736            perception. *Nature Machine Intelligence*, 2(4), 210–219.  
737            <https://doi.org/10.1038/s42256-020-0170-9>

- 738 Merigan, W. H., & Maunsell, J. H. R. (1993). How Parallel are the Primate  
739 Visual Pathways? *Annual Review of Neuroscience*, *16*(1), 369–402.  
740 <https://doi.org/10.1146/annurev.ne.16.030193.002101>
- 741 Milner, A. D., & Goodale, M. A. (2008). Two visual systems re-viewed.  
742 *Neuropsychologia*, *46*(3), 774–785.  
743 <https://doi.org/10.1016/j.neuropsychologia.2007.10.005>
- 744 Milner, A. D., Paulignan, Y., Dijkerman, H. C., Michel, F., & Jeannerod, M.  
745 (1999). A paradoxical improvement of misreaching in optic ataxia:  
746 New evidence for two separate neural systems for visual localization.  
747 *Proceedings of the Royal Society of London. Series B: Biological*  
748 *Sciences*, *266*(1434), 2225–2229.  
749 <https://doi.org/10.1098/rspb.1999.0912>
- 750 Milner, A. D., Perrett, D. I., Johnston, R. S., Benson, P. J., Jordan, T. R.,  
751 Heeley, D. W., Bettucci, D., Mortara, F., Mutani, R., Terazzi, E., &  
752 Davidson, D. L. W. (1991). PERCEPTION AND ACTION IN  
753 ‘VISUAL FORM AGNOSIA.’ *Brain*, *114*(1), 405–428.  
754 <https://doi.org/10.1093/brain/114.1.405>
- 755 Mishkin, M., & Ungerleider, L. G. (1982). Contribution of striate inputs to  
756 the visuospatial functions of parieto-preoccipital cortex in monkeys.  
757 *Behavioural Brain Research*, *6*(1), 57–77.  
758 [https://doi.org/10.1016/0166-4328\(82\)90081-X](https://doi.org/10.1016/0166-4328(82)90081-X)



- 759 Nene, S. A., Nayar, S. K., & Murase, H. (1996). *Object image library (COIL-*  
760 *100*.
- 761 Norman, J. (2002). Two visual systems and two theories of perception: An  
762 attempt to reconcile the constructivist and ecological approaches.  
763 *Behavioral and Brain Sciences*, 25(1), 73–96.  
764 <https://doi.org/10.1017/S0140525X0200002X>
- 765 O'Reilly, R. C., Russin, J. L., Zolfaghar, M., & Rohrlich, J. (2020). Deep  
766 Predictive Learning in Neocortex and Pulvinar. *ArXiv:2006.14800 [q-*  
767 *Bio]*. <http://arxiv.org/abs/2006.14800>
- 768 O'Reilly, R. C., Wyatte, D. R., & Rohrlich, J. (2017). Deep Predictive  
769 Learning: A Comprehensive Model of Three Visual Streams.  
770 *ArXiv:1709.04654 [q-Bio]*. <http://arxiv.org/abs/1709.04654>
- 771 Rauschecker, J. P. (2018). Where, When, and How: Are they all  
772 sensorimotor? Towards a unified view of the dorsal pathway in vision  
773 and audition. *Cortex*, 98, 262–268.  
774 <https://doi.org/10.1016/j.cortex.2017.10.020>
- 775 Rogers, G., Smith, D., & Schenk, T. (2009). Immediate and delayed actions  
776 share a common visuomotor transformation mechanism: A prism  
777 adaptation study. *Neuropsychologia*, 47(6), 1546–1552.  
778 <https://doi.org/10.1016/j.neuropsychologia.2008.12.022>
- 779 Schaetti, N., Salomon, M., & Couturier, R. (2016). Echo State Networks-  
780 Based Reservoir Computing for MNIST Handwritten Digits

- 781 Recognition. *2016 IEEE Intl Conference on Computational Science*  
782 *and Engineering (CSE) and IEEE Intl Conference on Embedded and*  
783 *Ubiquitous Computing (EUC) and 15th Intl Symposium on*  
784 *Distributed Computing and Applications for Business Engineering*  
785 *(DCABES)*, 484–491. [https://doi.org/10.1109/CSE-EUC-](https://doi.org/10.1109/CSE-EUC-DCABES.2016.229)  
786 [DCABES.2016.229](https://doi.org/10.1109/CSE-EUC-DCABES.2016.229)
- 787 Schenk, T., & Hesse, C. (2018). Do we have distinct systems for immediate  
788 and delayed actions? A selective review on the role of visual memory  
789 in action. *Cortex*, 98, 228–248.  
790 <https://doi.org/10.1016/j.cortex.2017.05.014>
- 791 Schneider, G. E. (1969). Two Visual Systems. *Science*, 163(3870), 895–902.  
792 <https://doi.org/10.1126/science.163.3870.895>
- 793 Schrimpf, M., Kubilius, J., Hong, H., Majaj, N. J., Rajalingham, R., Issa, E.  
794 B., Kar, K., Bashivan, P., Prescott-Roy, J., Schmidt, K., Yamins, D.  
795 L. K., & DiCarlo, J. J. (2018). Brain-Score: Which Artificial Neural  
796 Network for Object Recognition is most Brain-Like? *BioRxiv*,  
797 407007. <https://doi.org/10.1101/407007>
- 798 Stewart, C. A., Welch, V., Plale, B., Fox, G., Pierce, M., & Sterling, T. (2017).  
799 *Indiana University Pervasive Technology Institute. Bloomington,*  
800 *Indiana.*
- 801 Tan, C., Sun, F., Kong, T., Zhang, W., Yang, C., & Liu, C. (2018). A Survey  
802 on Deep Transfer Learning. In V. Kůrková, Y. Manolopoulos, B.

- 803 Hammer, L. Iliadis, & I. Maglogiannis (Eds.), *Artificial Neural*  
804 *Networks and Machine Learning – ICANN 2018* (pp. 270–279).  
805 Springer International Publishing. [https://doi.org/10.1007/978-3-030-](https://doi.org/10.1007/978-3-030-01424-7_27)  
806 [01424-7\\_27](https://doi.org/10.1007/978-3-030-01424-7_27)
- 807 Trevarthen, C. B. (1968). Two mechanisms of vision in primates.  
808 *Psychologische Forschung*, *31*(4), 299–337.  
809 <https://doi.org/10.1007/BF00422717>
- 810 Yamins, D. L., Hong, H., Cadieu, C., & DiCarlo, J. J. (2013). Hierarchical  
811 Modular Optimization of Convolutional Networks Achieves  
812 Representations Similar to Macaque IT and Human Ventral Stream.  
813 In C. J. C. Burges, L. Bottou, M. Welling, Z. Ghahramani, & K. Q.  
814 Weinberger (Eds.), *Advances in Neural Information Processing*  
815 *Systems 26* (pp. 3093–3101). Curran Associates, Inc.  
816 [http://papers.nips.cc/paper/4991-hierarchical-modular-optimization-](http://papers.nips.cc/paper/4991-hierarchical-modular-optimization-of-convolutional-networks-achieves-representations-similar-to-macaque-it-and-human-ventral-stream.pdf)  
817 [of-convolutional-networks-achieves-representations-similar-to-](http://papers.nips.cc/paper/4991-hierarchical-modular-optimization-of-convolutional-networks-achieves-representations-similar-to-macaque-it-and-human-ventral-stream.pdf)  
818 [macaque-it-and-human-ventral-stream.pdf](http://papers.nips.cc/paper/4991-hierarchical-modular-optimization-of-convolutional-networks-achieves-representations-similar-to-macaque-it-and-human-ventral-stream.pdf)
- 819 Yamins, D. L. K., & DiCarlo, J. J. (2016). Using goal-driven deep learning  
820 models to understand sensory cortex. *Nature Neuroscience*, *19*(3),  
821 356–365. <https://doi.org/10.1038/nn.4244>
- 822 Zheng, H., Yuan, J., & Chen, L. (2017). Short-Term Load Forecasting Using  
823 EMD-LSTM Neural Networks with a Xgboost Algorithm for Feature

824            Importance        Evaluation.        *Energies*,        10(8),        1168.

825            <https://doi.org/10.3390/en10081168>

826

827
